# Supplementary material for: Modified floating-zone crystal growth of Mg4Ta2O9 and its scintillation performance
Source: Royal Society of Chemistry journal article supplement (doi:10.1039/d0ce00388c), 2020-01-01
Supplement: d0ce00388c1.pdf [file d0ce00388c1.pdf]

## Supporting Information

**Table S1.** Selected crystal data and structure refinement parameters for Mg<sub>4</sub>Ta<sub>2</sub>O<sub>9</sub>.

|                                                      |                                                     |
|------------------------------------------------------|-----------------------------------------------------|
| Empirical formula                                    | Mg <sub>4</sub> Ta <sub>2</sub> O <sub>9</sub>      |
| Formula weight                                       | 603.14                                              |
| Temperature                                          | 292(2) K                                            |
| Radiation, wavelength                                | Mo-K $\alpha$ , 0.71073 Å                           |
| Crystal system                                       | Trigonal                                            |
| Space group                                          | P $\bar{3}c1$ (No.165)                              |
| Unit cell dimensions                                 | a = b = 5.1626(10) Å<br>c = 14.035(4) Å             |
| $\alpha, \beta, \gamma$                              | 90°, 90°, 120°                                      |
| Unit cell volume, Z                                  | 323.94(15) Å <sup>3</sup> , 2                       |
| Density (calc.)                                      | 6.183 g/cm <sup>3</sup>                             |
| Goodness-of-fit on F <sup>2</sup>                    | 1.599                                               |
| Final R indices <sup>a</sup><br>[I > 2 $\sigma$ (I)] | R <sub>1</sub> = 0.0117<br>wR <sub>2</sub> = 0.0228 |
| Final R indices <sup>a</sup><br>[all data]           | R <sub>1</sub> = 0.0188<br>wR <sub>2</sub> = 0.0238 |

<sup>a</sup>  $R_1 = \sum ||F_o| - |F_c|| / \sum |F_o|$ ;  $wR_2 = [\sum [w(F_o^2 - F_c^2)^2] / \sum [w(F_o^2)^2]]^{1/2}$ , and  $w = 1 / [\sigma^2 F_o^2 + (A \cdot P)^2 + B \cdot P]$ ,  
 $P = (F_o^2 + 2F_c^2) / 3$ ; A and B are weight coefficients.
